# Supplementary material for: The green tea catechin EGCG provides proof-of-concept for a pan-coronavirus attachment inhibitor
Source: Research Square preprint supplement (doi:10.21203/rs.3.rs-1497836/v1), 2022-04-26

Supplementary materials for

**The green tea catechin EGCG provides proof-of-concept for a  
pan-coronavirus attachment inhibitor**

Emmanuelle V. LeBlanc and Che C. Colpitts

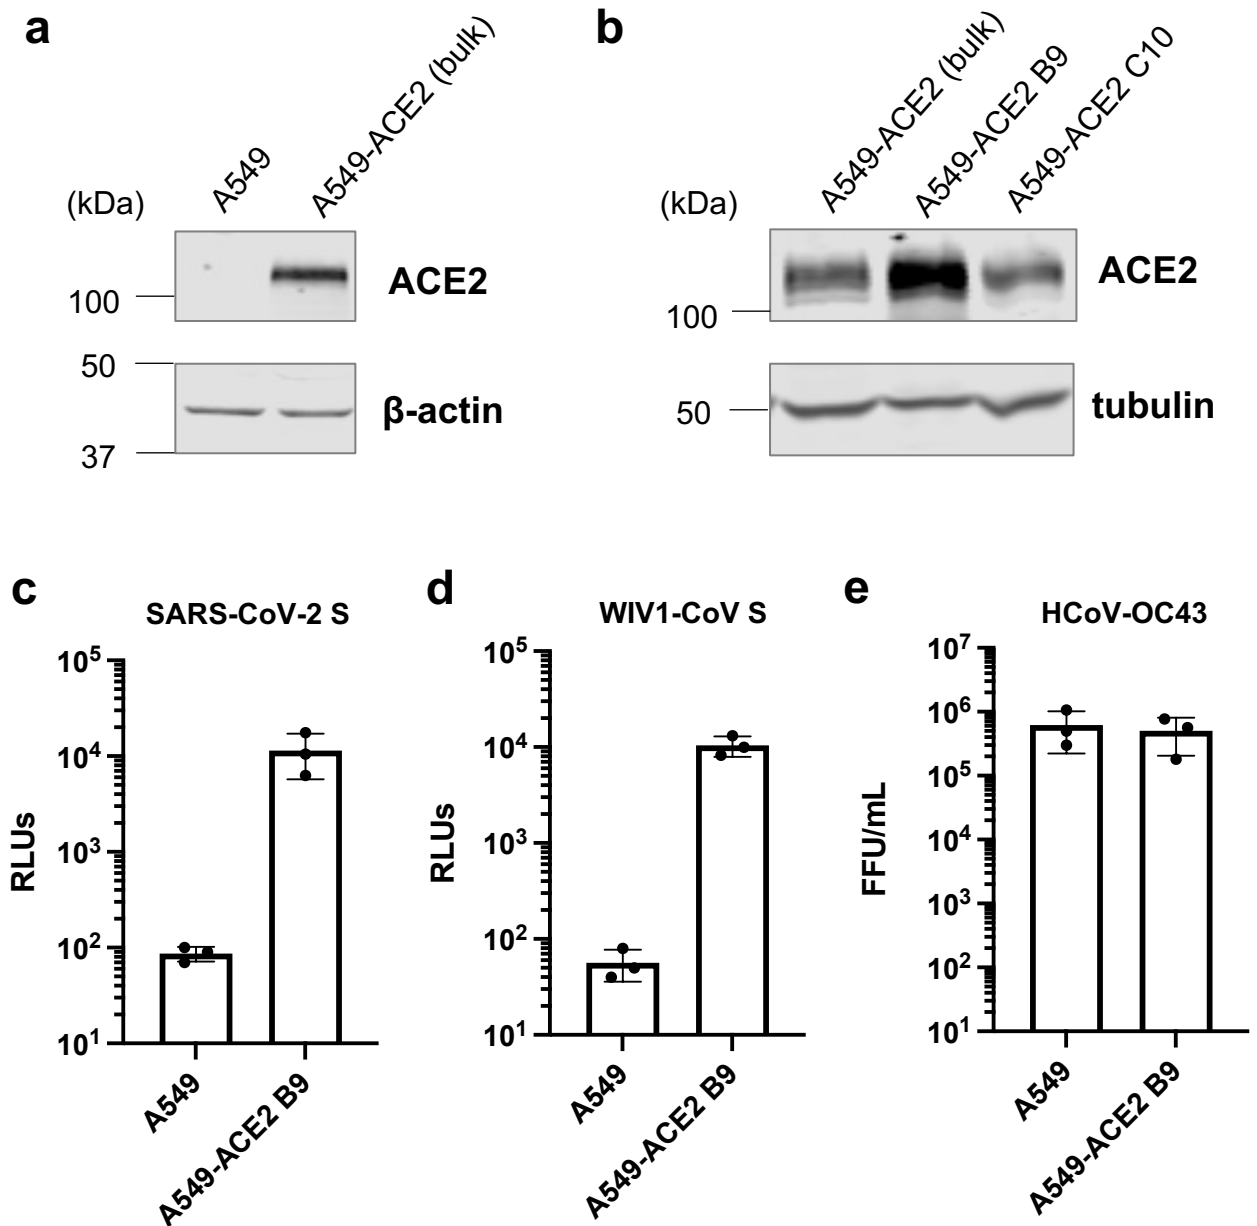

**Figure S1. A549-ACE2 B9 expresses high levels of ACE2 and is susceptible to SARS-CoV-2 pseudoparticle infection.** Western blot shows overexpression of ACE2 in the bulk transduced A549 cells (a) and in single cell clones (b) with A549-ACE2 B9 showing highest levels of ACE2 expression. Representative blots are shown. SARS-CoV-2 (c) and WIV1-CoV (d) pseudoparticle infection is dependent on ACE2, while HCoV-OC43 (e) infection is not. Mean value with standard deviation are plotted.

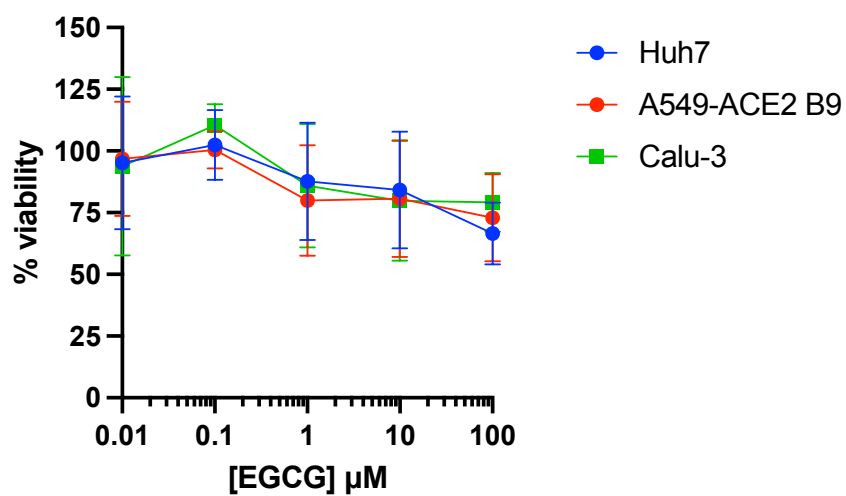

**Figure S2. EGCG exposure for 24 hours has minor effects on cell viability.** Cell viability was assessed after 24h EGCG exposure. Mean values with standard deviation of two independent experiments with duplicates are plotted.

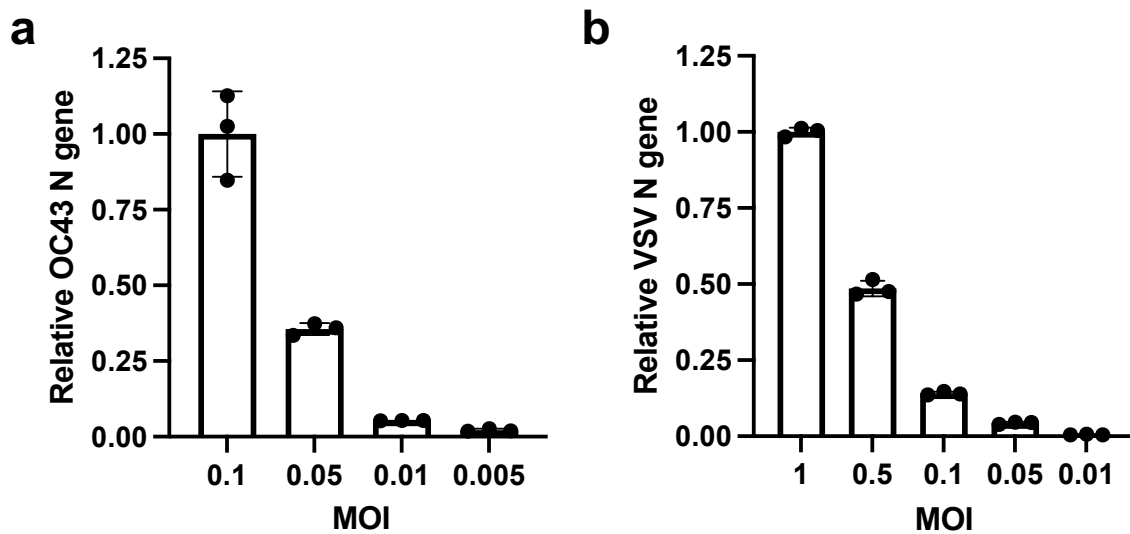

**Figure S3. RT-qPCR quantification of bound virions.** Pre-chilled Huh7 cells were inoculated with HCoV-OC43 (a) or VSV-SARS-CoV-2 (b) at indicated MOI for 1 hour on ice. Attached virus was quantified by RT-qPCR after washing with PBS three times. Mean values with standard deviation from qPCR triplicates are plotted.

# Full-length blots

From Figure 4b.

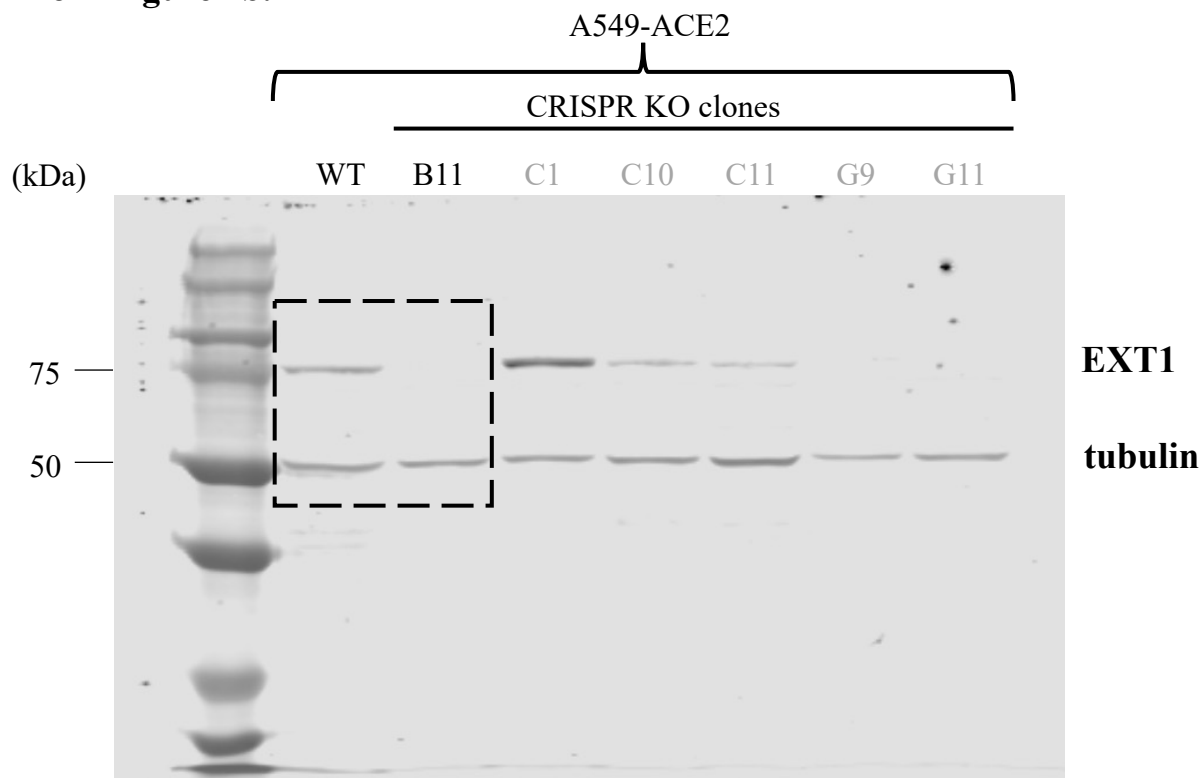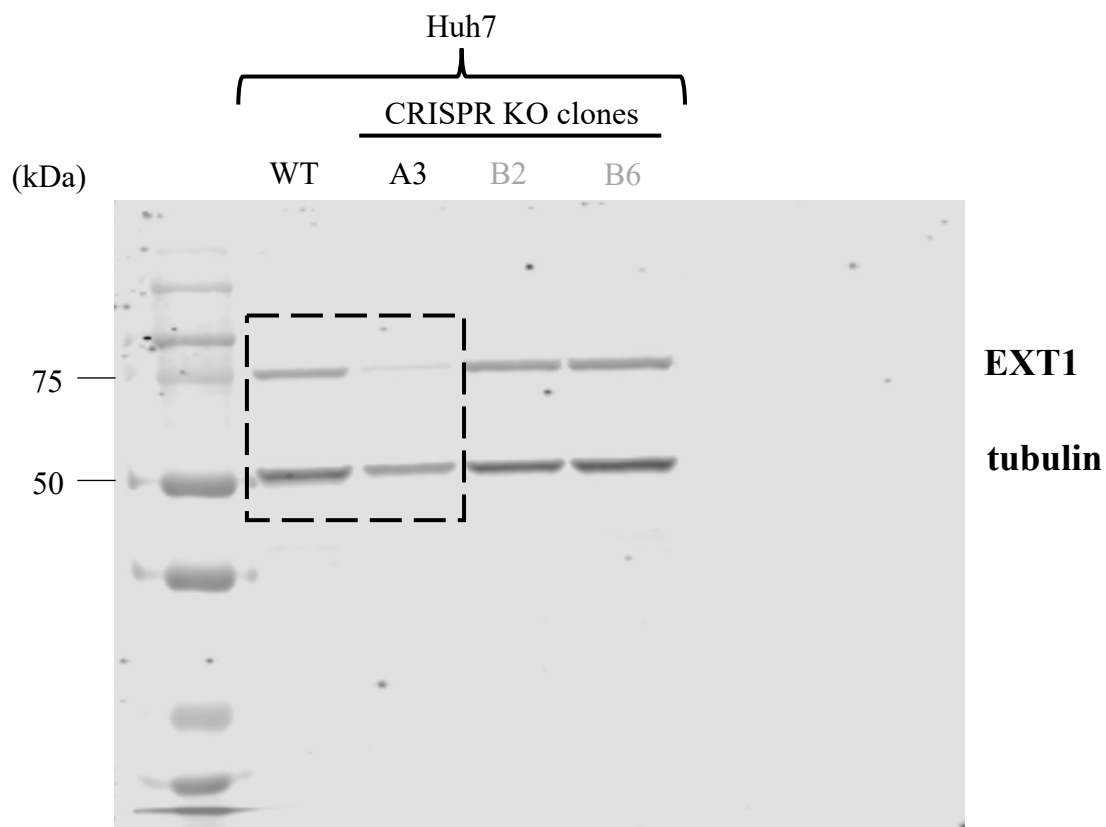

**From Figure S1a.**

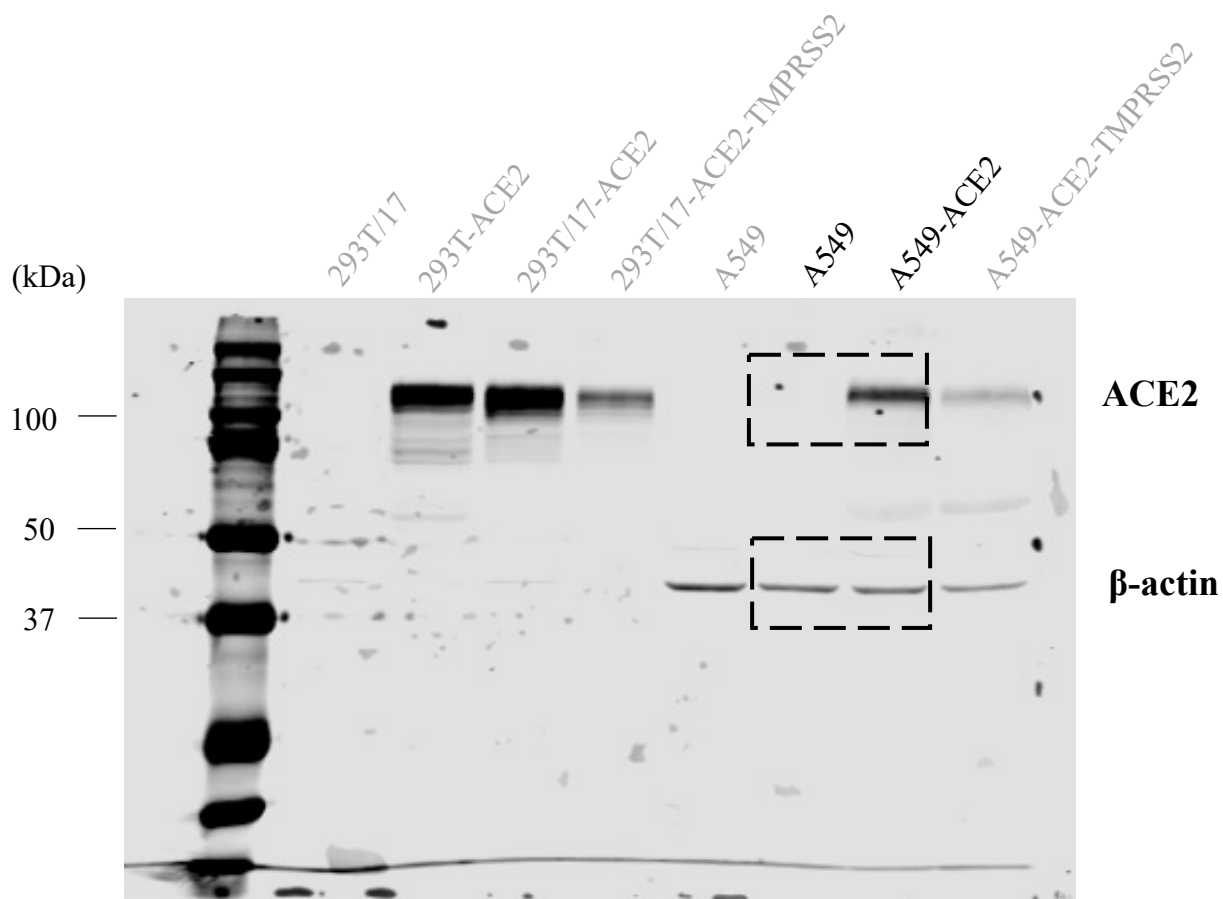

**From Figure S1b.**

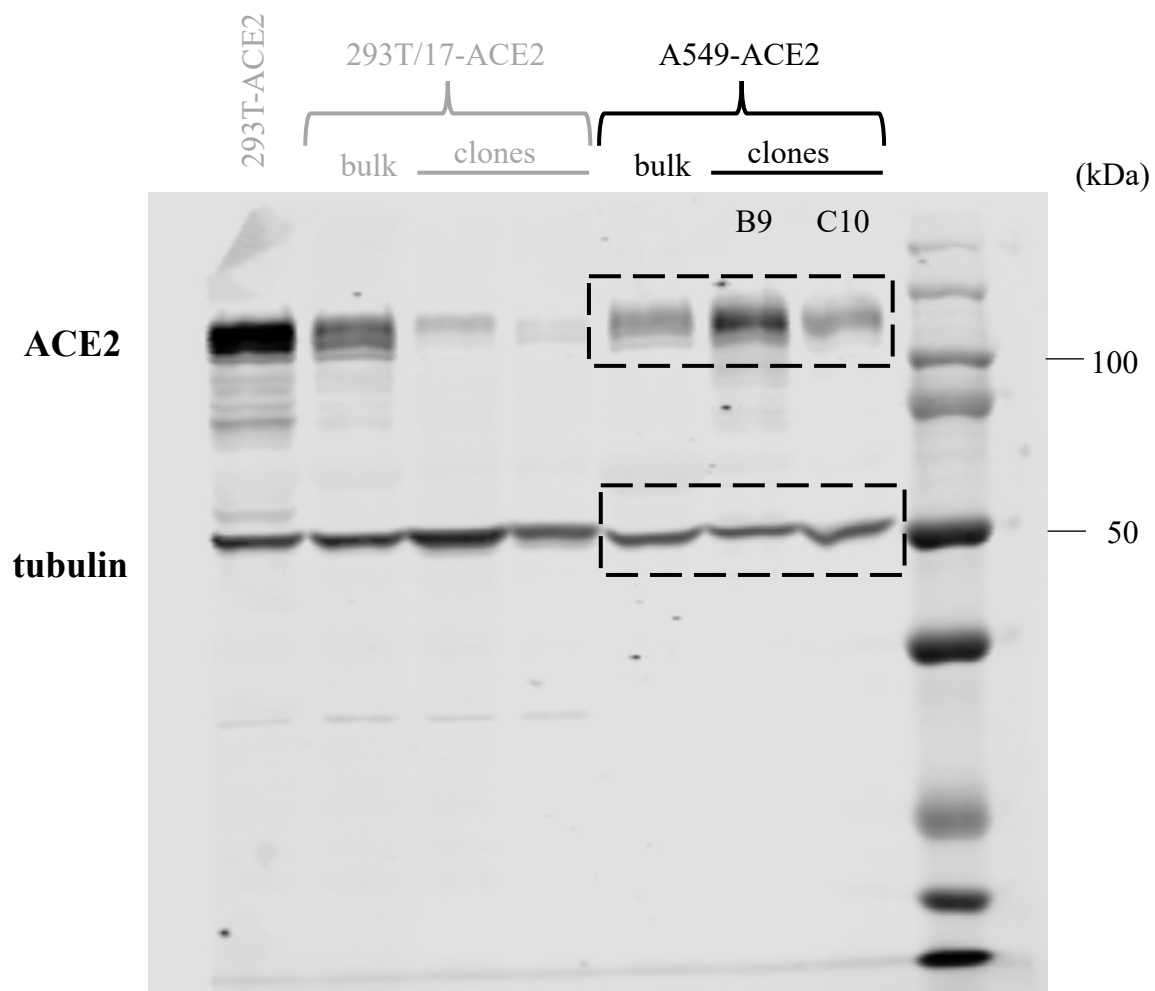

Supplement: Supplementary file 1 [file 4daa5e824957e6f1158a06cf.pdf]
